# Supplementary material
Source: PubMed Central journal article supplement (PMC7339117)
Supplement: NIHMS1588773-supplement-Supplemental_Table_1.pdf [file NIHMS1588773-supplement-Supplemental_Table_1.pdf]

Supplemental Table 1. AR and ARv7 Co-expression and Gleason Grading System

| Grade                  | GG1          | GG2          | GG3          | GG4          | GG5                 |
|------------------------|--------------|--------------|--------------|--------------|---------------------|
| Number of patients (n) | n=74         | n=67         | n=14         | n=8          | n=16                |
| Percent AR-/ARv7-      | 30.89 ± 2.34 | 29.85 ± 2.63 | 28.76 ± 6.11 | 30.48 ± 7.25 | <b>46.35 ± 6.11</b> |
| Percent AR+/ARv7-      | 31.84 ± 1.8  | 26.79 ± 1.9  | 24.17 ± 3.45 | 34.14 ± 7.16 | 26.87 ± 4.03        |
| Percent AR-/ARv7+      | 2.6 ± 0.23   | 2.99 ± 0.26  | 2.93 ± 0.45  | 3.67 ± 1.16  | 2.69 ± 0.43         |
| Percent AR+/ARv7+      | 34.68 ± 2.29 | 40.37 ± 2.64 | 44.15 ± 6.77 | 31.72 ± 6.61 | <b>24.1 ± 4.47</b>  |

Values represented as mean ± standard error of the mean, with bolded values statistically significant compared to GG1 within each category.
